# Supplementary material
Source: MDPI journal article supplement (https://www.mdpi.com/1999-4907/13/3/477)
Supplement: s1 [file s1]

## Supplementary Material

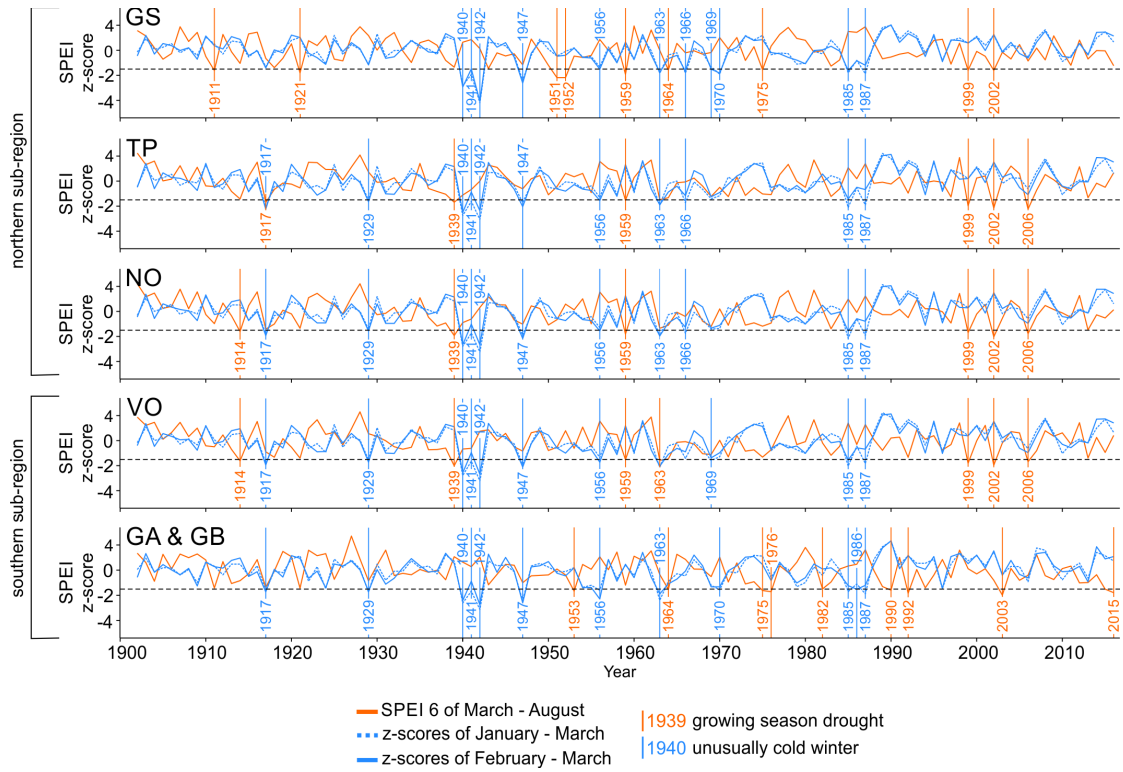

**Figure S1.** SPEI6 integrated over March – August season (orange line) and z-scores of January – March (dashed blue line) and February – March (solid blue line) temperatures as well as individual site-specific growing season droughts (orange vertical lines) and unusually cold winters (blue vertical lines) which exceed a threshold of SPEI and z-score  $\leq -1.5$  (horizontal dashed line). See Table 1 in the article for description of site names and abbreviations.

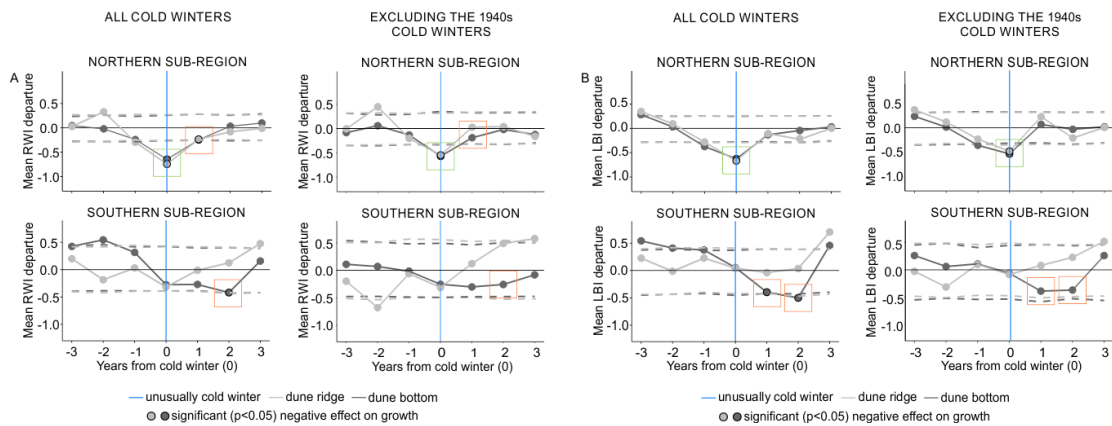

**Figure S2.** The results of superposed epoch analysis (SEA) conducted to study the robustness of the method. The comparison has been done for the SEA performed for all and selected (all excluding the events in the 1940s) superposed sub-region-specific cold winter events, ring width (A) and

latewood blue intensity (B) datasets. Light and dark gray represent dune ridge and bottom microsites, respectively. Blue line shows an event year (i.e., superposed sub-region-specific cold winters) and circles with black outline present significant negative effect on growth. Horizontal dashed lines represent significance threshold at  $p < 0.05$ . Green rectangle indicates that after excluding the 1940s cold winter events from the SEA, the response stayed significant within a sub-region and a tree-ring parameter. Orange rectangle indicates that after excluding the 1940s cold winter events from the SEA, the response has turned to be insignificant within a sub-region and a tree-ring parameter.

**Table S1.** Descriptive statistics of ring width (RW) and latewood blue intensity (LBI) chronologies per microsite calculated for the 1902-2016 period relevant for Superposed Epoch Analysis.

| Region  | Microsite | Chronology span (years)<br>N>5 |           | EPS  |      | Rbar |      | GLK  |      |
|---------|-----------|--------------------------------|-----------|------|------|------|------|------|------|
|         |           | RW                             | LBI       | RW   | LBI  | RW   | LBI  | RW   | LBI  |
| Estonia | VOR       | 1816-2016                      | 1816-2016 | 0.97 | 0.95 | 0.44 | 0.33 | 0.65 | 0.63 |
|         | VOB       | 1816-2016                      | 1829-2016 | 0.97 | 0.84 | 0.43 | 0.15 | 0.65 | 0.63 |
|         | TPR       | 1861-2016                      | 1862-2016 | 0.96 | 0.94 | 0.38 | 0.30 | 0.66 | 0.64 |
|         | TPB       | 1875-2016                      | 1875-2016 | 0.97 | 0.96 | 0.40 | 0.35 | 0.66 | 0.68 |
|         | NOR       | 1819-2016                      | 1829-2016 | 0.97 | 0.94 | 0.42 | 0.21 | 0.64 | 0.62 |
|         | NOB       | 1825-2016                      | 1825-2016 | 0.95 | 0.92 | 0.40 | 0.30 | 0.64 | 0.64 |
| Sweden  | GSR       | 1683-2016                      | 1724-2016 | 0.93 | 0.90 | 0.31 | 0.24 | 0.61 | 0.62 |
|         | GSB       | 1804-2016                      | 1808-2016 | 0.94 | 0.90 | 0.45 | 0.34 | 0.66 | 0.63 |
| Poland  | GBR       | 1854-2016                      | 1857-2016 | 0.95 | 0.91 | 0.39 | 0.27 | 0.64 | 0.62 |
|         | GBB       | 1852-2016                      | 1853-2016 | 0.96 | 0.92 | 0.43 | 0.30 | 0.67 | 0.62 |
|         | GAR       | 1859-2016                      | 1859-2016 | 0.95 | 0.93 | 0.39 | 0.33 | 0.66 | 0.62 |
|         | GAB       | 1852-2016                      | 1852-2016 | 0.94 | 0.95 | 0.37 | 0.38 | 0.64 | 0.64 |

**Table S2.** Results of superposed epoch analysis for all individual growing season droughts, microsite ring-width (RW), and latewood blue intensity (LBI) chronologies. White cells indicate lack of drought detected at a certain site, while orange cells indicate identified drought. The numbers in the orange cells indicate the timing of growth response, for example, 0 means an effect on RW/LBI in the event year, +1, +2, and +3 mean an effect on RW/LBI one, two, and three year(s) after the event. At the same time, these numbers indicate the duration of growth reductions, for example: 1, 2, and 3 in a single orange cell mean that growth reduction lasted three years. A blank orange cell (i.e., with no numerical value) indicates an absence of drought effect on growth although drought was climatically recorded. See Table 1 in the article for description of (micro)site names and abbreviations.

| year | ring width |     |     |      |     |     |        |     |     |     |     |     |
|------|------------|-----|-----|------|-----|-----|--------|-----|-----|-----|-----|-----|
|      | GS         |     | TP  |      | NO  |     | VO     |     | GA  |     | GB  |     |
|      | GSR        | GSB | TPR | TPB  | NOR | NOB | VOR    | VOB | GAR | GAB | GBR | GBB |
| 1911 |            |     |     |      |     |     |        |     |     |     |     |     |
| 1914 |            |     |     |      |     |     |        |     |     |     |     |     |
| 1917 |            |     |     |      |     |     |        |     |     |     |     |     |
| 1921 |            |     |     |      |     |     |        |     |     |     |     |     |
| 1939 |            |     | +1  | +1,2 | +1  |     | +1,2,3 | +1  |     |     |     |     |
| 1951 |            |     |     |      |     |     |        |     |     |     |     |     |
| 1952 |            |     |     |      |     |     |        |     |     |     |     |     |
| 1953 |            |     |     |      |     |     |        |     | +1  |     | +1  |     |
| 1959 |            |     |     |      |     |     |        |     |     |     |     |     |
| 1963 |            |     |     |      |     |     |        |     |     |     |     |     |
| 1964 |            |     |     |      |     |     |        |     |     |     |     |     |

|      |  |  |  |      |  |  |  |  |    |  |  |  |
|------|--|--|--|------|--|--|--|--|----|--|--|--|
| 1975 |  |  |  |      |  |  |  |  | +2 |  |  |  |
| 1976 |  |  |  |      |  |  |  |  | +1 |  |  |  |
| 1982 |  |  |  |      |  |  |  |  | +1 |  |  |  |
| 1990 |  |  |  |      |  |  |  |  |    |  |  |  |
| 1992 |  |  |  |      |  |  |  |  |    |  |  |  |
| 1999 |  |  |  |      |  |  |  |  |    |  |  |  |
| 2002 |  |  |  | +1,2 |  |  |  |  |    |  |  |  |
| 2003 |  |  |  |      |  |  |  |  |    |  |  |  |
| 2006 |  |  |  |      |  |  |  |  |    |  |  |  |
| 2015 |  |  |  |      |  |  |  |  |    |  |  |  |

| year | latewood blue intensity |     |     |     |     |     |        |     |     |     |      |     |
|------|-------------------------|-----|-----|-----|-----|-----|--------|-----|-----|-----|------|-----|
|      | GS                      |     | TP  |     | NO  |     | VO     |     | GA  |     | GB   |     |
|      | GSR                     | GSB | TPR | TPB | NOR | NOB | VOR    | VOB | GAR | GAB | GBR  | GBB |
| 1911 |                         |     |     |     |     |     |        |     |     |     |      |     |
| 1914 |                         |     |     |     |     |     |        |     |     |     |      |     |
| 1917 |                         |     |     |     |     |     |        |     |     |     |      |     |
| 1921 |                         |     |     |     |     |     |        |     |     |     |      |     |
| 1939 |                         |     | +1  |     | +1  | +1  | +1,2,3 | +1  |     |     |      |     |
| 1951 |                         |     |     |     |     |     |        |     |     |     |      |     |
| 1952 |                         |     |     |     |     |     |        |     |     |     |      |     |
| 1953 |                         |     |     |     |     |     |        |     | +1  | +1  | +1   |     |
| 1959 | +1,3                    |     |     | +3  |     | +1  |        |     |     |     |      |     |
| 1963 |                         |     |     |     |     |     |        |     |     |     |      |     |
| 1964 |                         |     |     |     |     |     |        |     |     |     |      |     |
| 1975 |                         |     |     |     |     |     |        |     | +1  | +1  | +1,2 |     |
| 1976 |                         |     |     |     |     |     |        |     | 0   | 0   | 0,+1 |     |
| 1982 |                         |     |     |     |     |     |        |     | 0   |     |      |     |
| 1990 |                         |     |     |     |     |     |        |     |     |     |      |     |
| 1992 |                         |     |     |     |     |     |        |     |     |     |      |     |
| 1999 |                         |     |     |     |     |     |        |     |     |     |      |     |
| 2002 |                         |     | +1  | +1  | +1  |     | +3     |     |     |     |      |     |
| 2003 |                         |     |     |     |     |     |        |     | +3  |     | +3   |     |
| 2006 |                         |     |     |     |     |     | 0      |     |     |     |      |     |
| 2015 |                         |     |     |     |     |     |        |     |     |     |      |     |

**Table S3.** Results of superposed epoch analysis for all individual unusually cold winter events, microsite ring-width (RW), and latewood blue intensity (LBI) chronologies. White cells indicate lack of cold winter detected at a certain site, while blue cells indicate identified cold winter. The numbers in the blue cells indicate the timing of growth response, for example, 0 means an effect on RW/LBI in the event year, +1, +2, and +3 mean an effect on RW/LBI one, two, and three year(s) after the event. At the same time, these numbers indicate the duration of growth reductions, for example: 1, 2, and 3 in a single blue cell mean that growth reduction lasted three years. A blank blue cell (i.e., with no numerical value) indicates an absence of cold winter effect on growth although winter frost was climatically recorded. See Table 1 in the article for description of (micro)site names and abbreviations.

| year | ring width |      |     |      |     |     |        |      |     |      |     |     |
|------|------------|------|-----|------|-----|-----|--------|------|-----|------|-----|-----|
|      | GS         |      | TP  |      | NO  |     | VO     |      | GA  |      | GB  |     |
|      | GSR        | GSB  | TPR | TPB  | NOR | NOB | VOR    | VOB  | GAR | GAB  | GBR | GBB |
| 1917 |            |      |     |      |     |     |        |      |     | +1,2 |     | +2  |
| 1929 |            |      |     |      |     |     |        | +1,2 |     |      |     |     |
| 1940 | 0,+1,2     | 0,+1 | 0   | 0,+1 | 0   |     | 0,+1,2 | 0    |     |      |     |     |
| 1941 | 0,+1       | 0    |     | 0    |     |     | +1     |      |     |      |     |     |
| 1942 | 0          |      |     |      |     |     | 0      |      |     |      |     |     |
| 1947 |            |      |     |      |     |     |        |      | +2  | +2   | +2  | +2  |
| 1956 |            |      | 0   |      | 0   |     | 0      |      |     |      |     |     |
| 1963 |            |      |     |      |     |     |        |      |     |      |     |     |
| 1966 |            |      |     |      |     |     |        |      |     |      |     |     |
| 1969 |            |      |     |      |     |     | +2     |      |     |      |     |     |
| 1970 |            |      |     |      |     |     |        |      |     |      |     |     |
| 1985 |            |      |     | 0    |     |     |        |      |     |      |     |     |
| 1986 |            |      |     |      |     |     |        |      |     |      |     |     |
| 1987 |            |      |     |      |     |     |        |      |     |      |     |     |

  

| Year | latewood blue intensity |     |     |      |     |     |          |     |      |      |        |      |
|------|-------------------------|-----|-----|------|-----|-----|----------|-----|------|------|--------|------|
|      | GS                      |     | TP  |      | NO  |     | VO       |     | GA   |      | GB     |      |
|      | GSR                     | GSB | TPR | TPB  | NOR | NOB | VOR      | VOB | GAR  | GAB  | GBR    | GBB  |
| 1917 |                         |     |     |      |     |     |          |     |      | +2   |        | +2   |
| 1929 |                         |     |     |      |     |     |          | +2  |      |      |        | +1   |
| 1940 | +1,2                    | +1  | 0   |      | 0   | 0   | 0,+1,2,3 | 0   |      |      |        |      |
| 1941 | 0,+1                    | 0   |     |      |     |     | 0,+1,2   |     |      |      |        |      |
| 1942 | 0                       |     |     |      |     |     | 0,+1     |     |      |      |        |      |
| 1947 |                         |     |     |      |     |     |          |     | +1,2 | +1,2 | +1,2,3 | +1,2 |
| 1956 |                         |     |     |      | 0   |     | 0        | 0   |      |      |        |      |
| 1963 |                         |     |     |      |     |     |          |     |      |      |        |      |
| 1966 |                         | +3  |     |      |     |     |          |     |      |      |        |      |
| 1969 |                         | 0   |     |      |     |     | +3       |     |      |      |        |      |
| 1970 |                         |     |     |      |     |     |          |     |      |      |        |      |
| 1985 | +2                      |     | 0   | 0,+2 |     |     |          |     |      |      |        |      |
| 1986 |                         |     |     |      |     |     |          |     |      |      |        |      |
| 1987 | 0                       |     |     | 0    |     |     |          |     |      |      |        |      |
